# Supplementary material for: Seasonal and comparative evidence of adaptive gene expression in mammalian brain size plasticity
Source: bioRxiv preprint, doi:10.1101/2024.06.18.599531, version 2 (2025-01-14)
Supplement: Supplemental Table 2 [file 599531_file10.xlsx]

## Sheet: Cluster1
Category	Term	Count	%	PValue	Genes	List Total	Pop Hits	Pop Total	Fold Enrichment	Bonferroni	Benjamini	FDR
KEGG_PATHWAY	hsa00250:Alanine, aspartate and glutamate metabolism	3	6.52174	0.00373554	GLS2, DDO, ASS1	23	37	8840	31.1633	0.23621	0.267187	0.263476
KEGG_PATHWAY	hsa01100:Metabolic pathways	10	21.7391	0.00894693	GRHPR, PFKL, GLS2, GPX6, ACACB, DDO, PLCD1, HK2, ASS1, GNMT	23	1561	8840	2.46219	0.476427	0.267187	0.263476
KEGG_PATHWAY	hsa05230:Central carbon metabolism in cancer	3	6.52174	0.0132445	PFKL, GLS2, HK2	23	71	8840	16.24	0.617097	0.267187	0.263476
KEGG_PATHWAY	hsa00470:D-Amino acid metabolism	2	4.34783	0.0148437	GLS2, DDO	23	6	8840	128.116	0.659302	0.267187	0.263476
KEGG_PATHWAY	hsa04152:AMPK signaling pathway	3	6.52174	0.0364526	PFKL, CIDEA, ACACB	23	122	8840	9.45118	0.930998	0.524918	0.517627
KEGG_PATHWAY	hsa00220:Arginine biosynthesis	2	4.34783	0.0557674	GLS2, ASS1	23	23	8840	33.4216	0.983942	0.669208	0.659914
KEGG_PATHWAY	hsa00052:Galactose metabolism	2	4.34783	0.0767706	PFKL, HK2	23	32	8840	24.0217	0.996821	0.732394	0.722222
KEGG_PATHWAY	hsa00051:Fructose and mannose metabolism	2	4.34783	0.0813771	PFKL, HK2	23	34	8840	22.6087	0.997782	0.732394	0.722222
KEGG_PATHWAY	hsa00260:Glycine, serine and threonine metabolism	2	4.34783	0.0973275	GRHPR, GNMT	23	41	8840	18.7487	0.999372	0.77862	0.767806

## Sheet: Cluster2
Category	Term	Count	%	PValue	Genes	List Total	Pop Hits	Pop Total	Fold Enrichment	Bonferroni	Benjamini	FDR
KEGG_PATHWAY	hsa05200:Pathways in cancer	6	12.5	0.0151989	GNA13, NOTCH2, TXNRD3, SP1, WNT7A, AGT	26	533	8840	3.82739	0.859197	1	1
KEGG_PATHWAY	hsa04270:Vascular smooth muscle contraction	3	6.25	0.0545236	GNA13, NPR1, AGT	26	134	8840	7.61194	0.999236	1	1
KEGG_PATHWAY	hsa05224:Breast cancer	3	6.25	0.0649917	NOTCH2, SP1, WNT7A	26	148	8840	6.89189	0.999816	1	1
KEGG_PATHWAY	hsa04072:Phospholipase D signaling pathway	3	6.25	0.065764	GNA13, AGT, RAPGEF4	26	149	8840	6.84564	0.999835	1	1
KEGG_PATHWAY	hsa04934:Cushing syndrome	3	6.25	0.0704637	SP1, WNT7A, AGT	26	155	8840	6.58065	0.999913	1	1
KEGG_PATHWAY	hsa00410:beta-Alanine metabolism	2	4.16667	0.0841873	ALDH2, ABAT	26	31	8840	21.9355	0.999987	1	1

## Sheet: Cluster3
Category	Term	Count	%	PValue	Genes	List Total	Pop Hits	Pop Total	Fold Enrichment	Bonferroni	Benjamini	FDR
KEGG_PATHWAY	hsa04974:Protein digestion and absorption	4	5	0.00808873	COL22A1, COL11A2, COL9A1, COL9A2	36	105	8840	9.3545	0.486227	0.524358	0.524358
KEGG_PATHWAY	hsa04820:Cytoskeleton in muscle cells	5	6.25	0.0127892	OBSCN, COL11A2, COL9A1, COL9A2, TRIM54	36	232	8840	5.29215	0.651975	0.524358	0.524358
KEGG_PATHWAY	hsa04022:cGMP-PKG signaling pathway	4	5	0.0274279	MEF2C, PDE2A, NPPA, BDKRB2	36	166	8840	5.917	0.897767	0.749695	0.749695
KEGG_PATHWAY	hsa04024:cAMP signaling pathway	4	5	0.0592809	ADORA2A, PPP1R1B, NPPA, DRD1	36	226	8840	4.34612	0.993336	1	1
KEGG_PATHWAY	hsa04020:Calcium signaling pathway	4	5	0.0782605	ADORA2A, ITPKA, BDKRB2, DRD1	36	254	8840	3.86702	0.998747	1	1

## Sheet: Cluster4
Category	Term	Count	%	PValue	Genes	List Total	Pop Hits	Pop Total	Fold Enrichment	Bonferroni	Benjamini	FDR
KEGG_PATHWAY	hsa04926:Relaxin signaling pathway	3	6.25	0.0252652	EDN1, GNB3, RXFP2	18	130	8840	11.3333	0.800543	1	1
KEGG_PATHWAY	hsa00600:Sphingolipid metabolism	2	4.16667	0.0990084	SMPD4, GLB1	18	54	8840	18.1893	0.998596	1	1

## Sheet: Cluster5
Category	Term	Count	%	PValue	Genes	List Total	Pop Hits	Pop Total	Fold Enrichment	Bonferroni	Benjamini	FDR
KEGG_PATHWAY	hsa04151:PI3K-Akt signaling pathway	6	7.79221	0.00590671	CDKN1A, ITGB5, DDIT4, GNB4, NGF, BCL2L1	30	362	8840	4.88398	0.558485	0.815126	0.815126
KEGG_PATHWAY	hsa01524:Platinum drug resistance	3	3.8961	0.0248734	CDKN1A, MGST3, BCL2L1	30	75	8840	11.7867	0.969067	1	1
KEGG_PATHWAY	hsa05200:Pathways in cancer	6	7.79221	0.0278911	CDKN1A, MGST3, GNB4, BDKRB1, FOS, BCL2L1	30	533	8840	3.31707	0.979832	1	1
KEGG_PATHWAY	hsa04725:Cholinergic synapse	3	3.8961	0.0542272	GNB4, KCNQ5, FOS	30	115	8840	7.68696	0.999544	1	1
KEGG_PATHWAY	hsa04210:Apoptosis	3	3.8961	0.07283	FOS, NGF, BCL2L1	30	136	8840	6.5	0.999971	1	1
KEGG_PATHWAY	hsa05418:Fluid shear stress and atherosclerosis	3	3.8961	0.0775297	DUSP1, MGST3, FOS	30	141	8840	6.2695	0.999985	1	1

## Sheet: Cluster6
Category	Term	Count	%	PValue	Genes	List Total	Pop Hits	Pop Total	Fold Enrichment	Bonferroni	Benjamini	FDR
KEGG_PATHWAY	hsa04514:Cell adhesion molecules	5	11.3636	0.00160887	CDH5, OCLN, PECAM1, ITGA6, SELE	30	157	8840	9.38429	0.203105	0.22685	0.22685
KEGG_PATHWAY	hsa04520:Adherens junction	4	9.09091	0.00337878	CDH5, CTNNA1, ARHGAP29, TGFBR2	30	93	8840	12.6738	0.37949	0.238204	0.238204
KEGG_PATHWAY	hsa04670:Leukocyte transendothelial migration	4	9.09091	0.00627456	CDH5, OCLN, CTNNA1, PECAM1	30	116	8840	10.1609	0.588316	0.294904	0.294904
KEGG_PATHWAY	hsa05418:Fluid shear stress and atherosclerosis	4	9.09091	0.0107175	CDH5, NOS3, PECAM1, SELE	30	141	8840	8.35934	0.781141	0.377793	0.377793
KEGG_PATHWAY	hsa05412:Arrhythmogenic right ventricular cardiomyopathy	3	6.81818	0.0320447	CTNNA1, ITGA6, SNTB1	30	86	8840	10.2791	0.98987	0.774673	0.774673
KEGG_PATHWAY	hsa04512:ECM-receptor interaction	3	6.81818	0.0341268	SPP1, ITGA6, CD44	30	89	8840	9.93258	0.992523	0.774673	0.774673
KEGG_PATHWAY	hsa04933:AGE-RAGE signaling pathway in diabetic complications	3	6.81818	0.0429631	NOS3, SELE, TGFBR2	30	101	8840	8.75248	0.997954	0.774673	0.774673
KEGG_PATHWAY	hsa04066:HIF-1 signaling pathway	3	6.81818	0.0492801	FLT1, NOS3, SLC2A1	30	109	8840	8.11009	0.999196	0.774673	0.774673
KEGG_PATHWAY	hsa04020:Calcium signaling pathway	4	9.09091	0.0494472	FLT1, EDNRB, NOS3, ITPR3	30	254	8840	4.64042	0.999215	0.774673	0.774673
KEGG_PATHWAY	hsa04926:Relaxin signaling pathway	3	6.81818	0.0673219	EDNRB, NOS3, TGFBR2	30	130	8840	6.8	0.999946	0.949238	0.949238
KEGG_PATHWAY	hsa04371:Apelin signaling pathway	3	6.81818	0.076582	NOS3, SPP1, ITPR3	30	140	8840	6.31429	0.999987	0.981642	0.981642
KEGG_PATHWAY	hsa05200:Pathways in cancer	5	11.3636	0.094105	EDNRB, SLC2A1, CTNNA1, ITGA6, TGFBR2	30	533	8840	2.76423	0.999999	1	1

## Sheet: Cluster7
Category	Term	Count	%	PValue	Genes	List Total	Pop Hits	Pop Total	Fold Enrichment	Bonferroni	Benjamini	FDR
KEGG_PATHWAY	hsa04914:Progesterone-mediated oocyte maturation	3	6.52174	0.0232473	CCNA2, CCNB1, PIK3CD	20	111	8840	11.9459	0.960144	1	1
KEGG_PATHWAY	hsa04218:Cellular senescence	3	6.52174	0.0439869	CCNA2, CCNB1, PIK3CD	20	157	8840	8.44586	0.997894	1	1
KEGG_PATHWAY	hsa05161:Hepatitis B	3	6.52174	0.0470653	IFIH1, CCNA2, PIK3CD	20	163	8840	8.13497	0.998646	1	1
KEGG_PATHWAY	hsa04820:Cytoskeleton in muscle cells	3	6.52174	0.0875554	MYH3, ITGA7, FBN1	20	232	8840	5.71552	0.999996	1	1
KEGG_PATHWAY	hsa05168:Herpes simplex virus 1 infection	4	8.69565	0.0982019	IFIH1, PIK3CD, SRSF5, ZNF26	20	522	8840	3.38697	0.999999	1	1

## Sheet: Cluster8
Category	Term	Count	%	PValue	Genes	List Total	Pop Hits	Pop Total	Fold Enrichment	Bonferroni	Benjamini	FDR
KEGG_PATHWAY	hsa05416:Viral myocarditis	3	3.75	0.0256157	CASP9, CAV1, MYH6	33	69	8840	11.6469	0.946725	1	1
KEGG_PATHWAY	hsa01232:Nucleotide metabolism	3	3.75	0.0376138	NT5C3B, UCK2, AK5	33	85	8840	9.45455	0.986863	1	1
KEGG_PATHWAY	hsa04820:Cytoskeleton in muscle cells	4	5	0.0506307	MYL3, COL9A3, MYH6, MYOM2	33	232	8840	4.6186	0.99718	1	1
KEGG_PATHWAY	hsa04371:Apelin signaling pathway	3	3.75	0.0907689	MYL3, AGTR1, MYLK3	33	140	8840	5.74026	0.999979	1	1
KEGG_PATHWAY	hsa01100:Metabolic pathways	10	12.5	0.0973129	NT5C3B, UGT8, UCK2, AOC2, PIGA, MTHFD2L, SRD5A3, B3GAT1, AK5, ALDH9A1	33	1561	8840	1.71607	0.999991	1	1

## Sheet: Cluster9
Category	Term	Count	%	PValue	Genes	List Total	Pop Hits	Pop Total	Fold Enrichment	Bonferroni	Benjamini	FDR
KEGG_PATHWAY	hsa04024:cAMP signaling pathway	4	8.16327	0.0250546	NFKBIA, POPDC2, GRIN3B, VIPR2	26	226	8840	6.0177	0.930349	1	1

## Sheet: Cluster10
Category	Term	Count	%	PValue	Genes	List Total	Pop Hits	Pop Total	Fold Enrichment	Bonferroni	Benjamini	FDR
KEGG_PATHWAY	hsa04080:Neuroactive ligand-receptor interaction	7	10.9375	0.00105117	ADCYAP1, CALCR, NPY5R, PMCH, TAC3, SSTR1, CGA	30	368	8840	5.60507	0.053221	0.0546608	0.0546608

[truncated: 2 more sheets: Cluster11, Cluster12]
